# Supplementary figures and images for: Bryorutstroemia (Rutstroemiaceae, Helotiales), a New Genus to Accommodate the Neglected Sclerotiniaceous Bryoparasitic Discomycete Helotium fulvum
Source: MDPI journal article supplement (doi:10.3390/life13041041), 2023-04-18

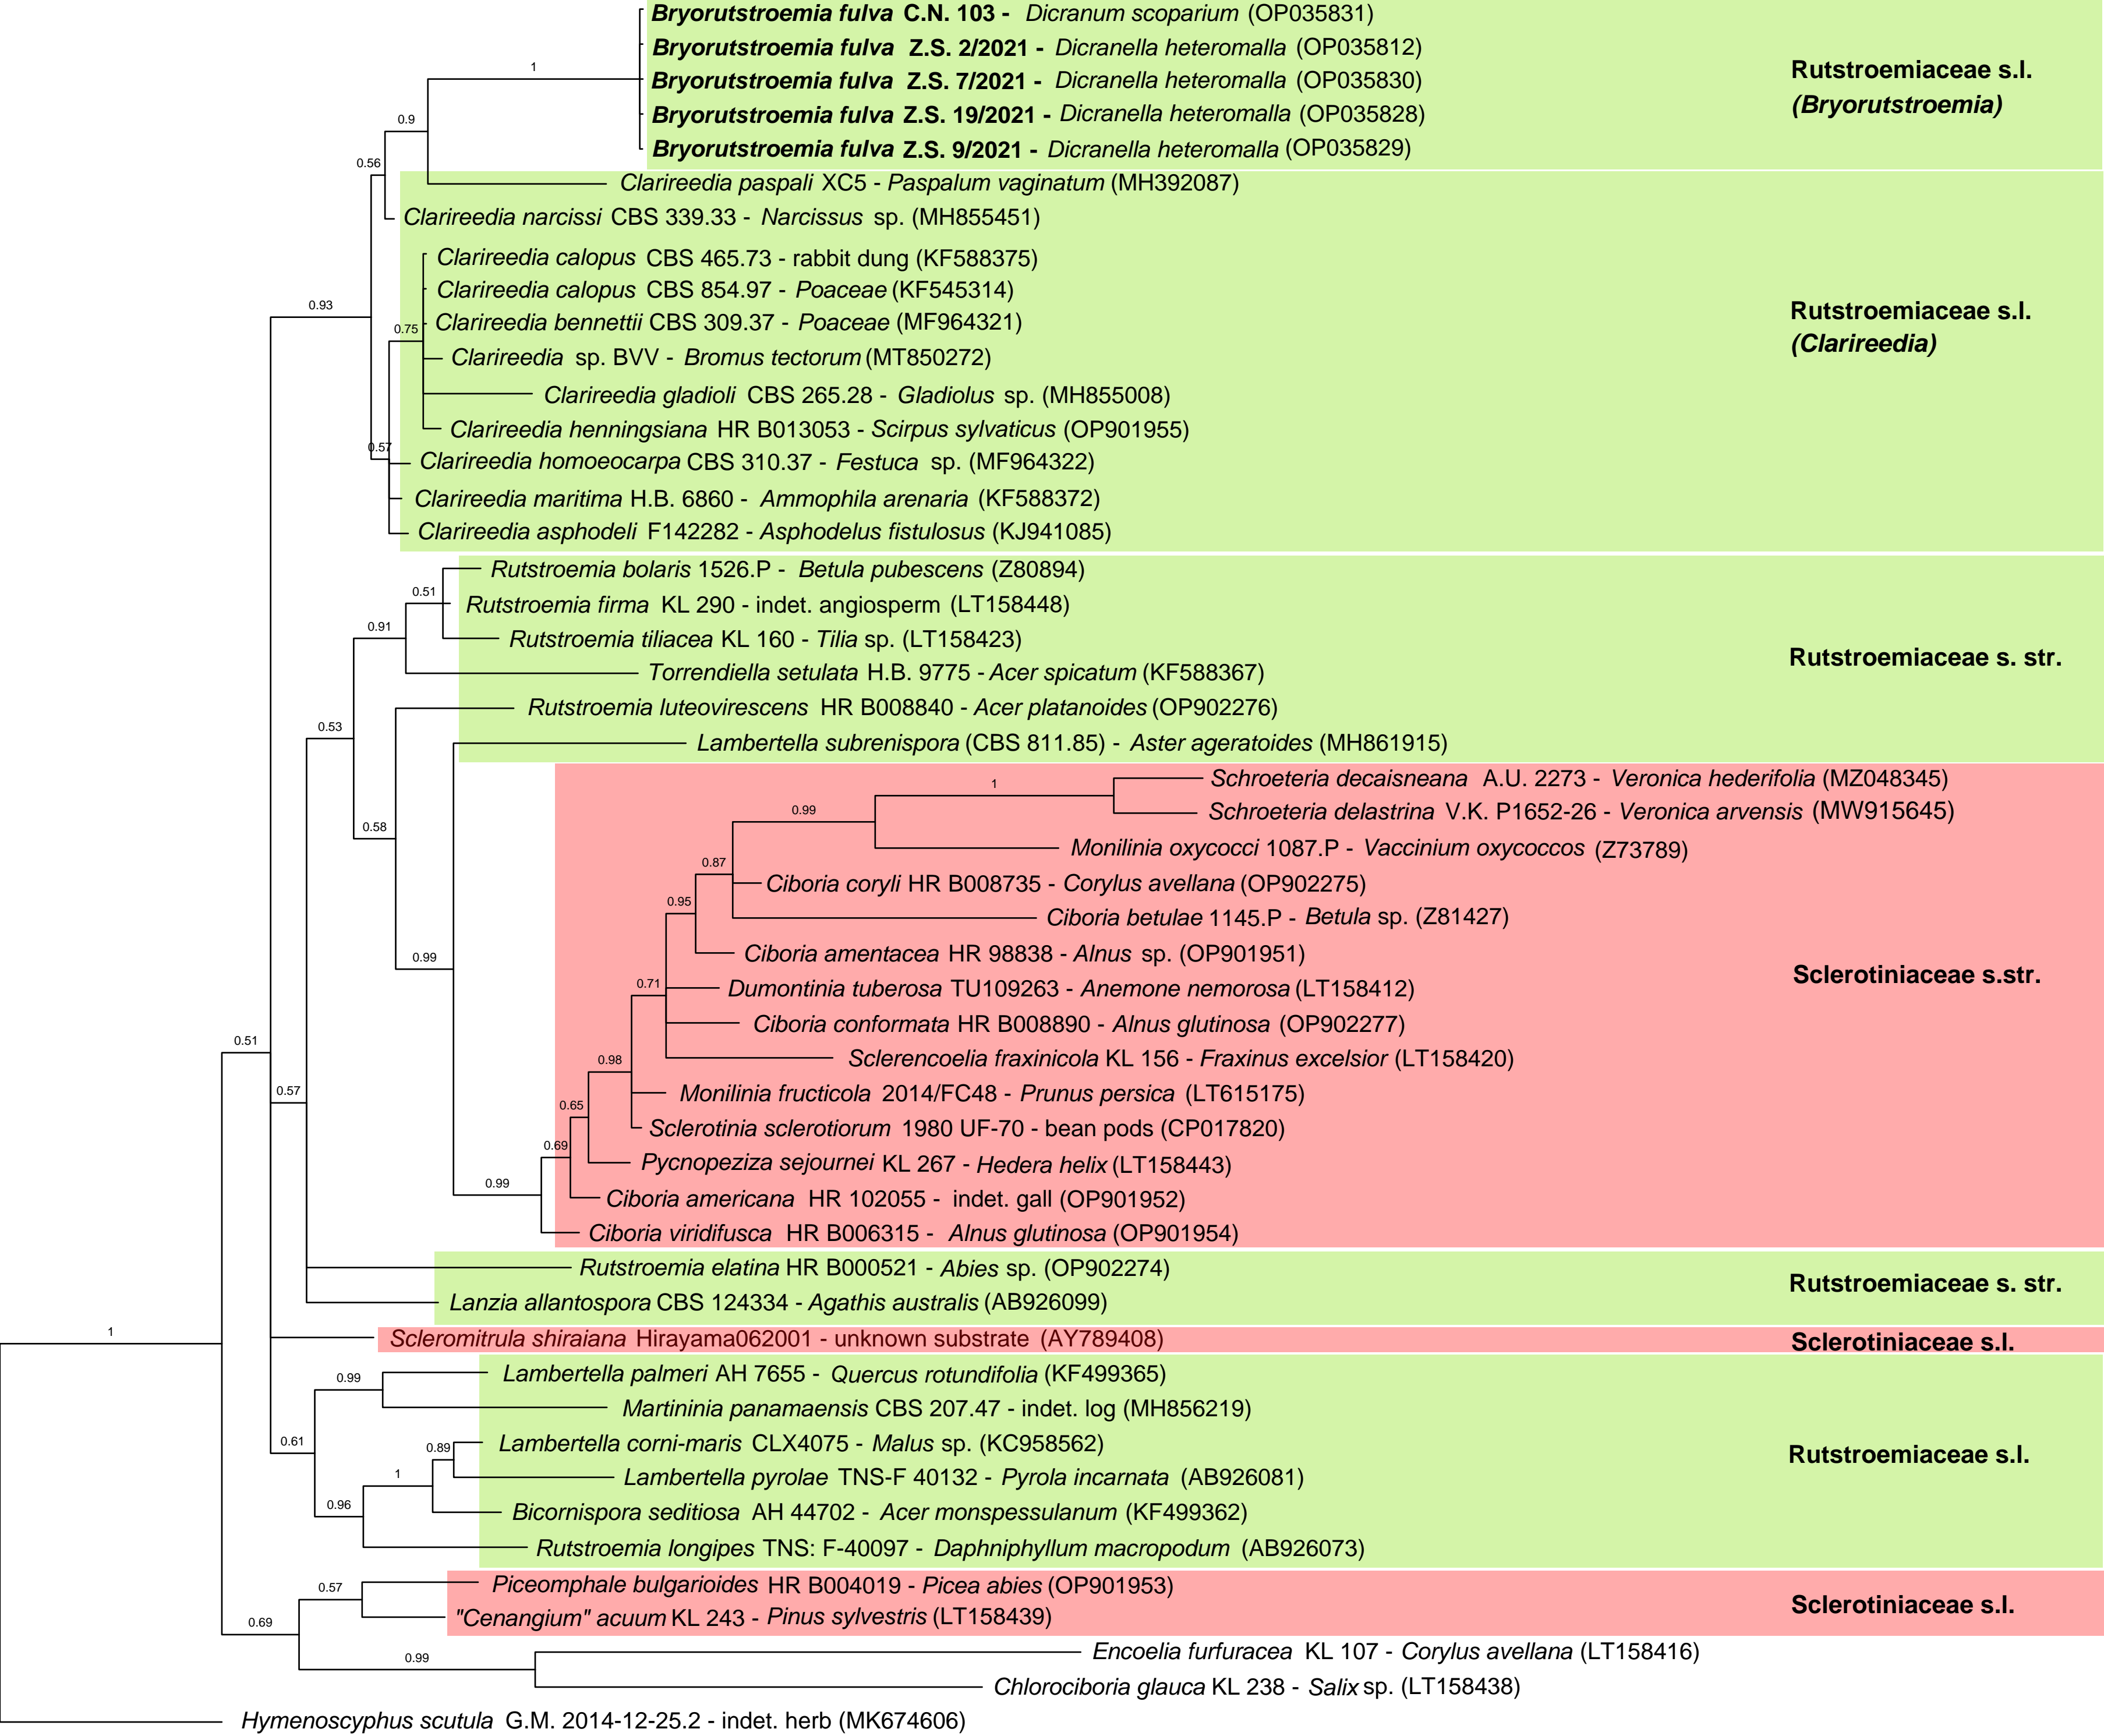

0.09

Supplement: s1 [file s1]

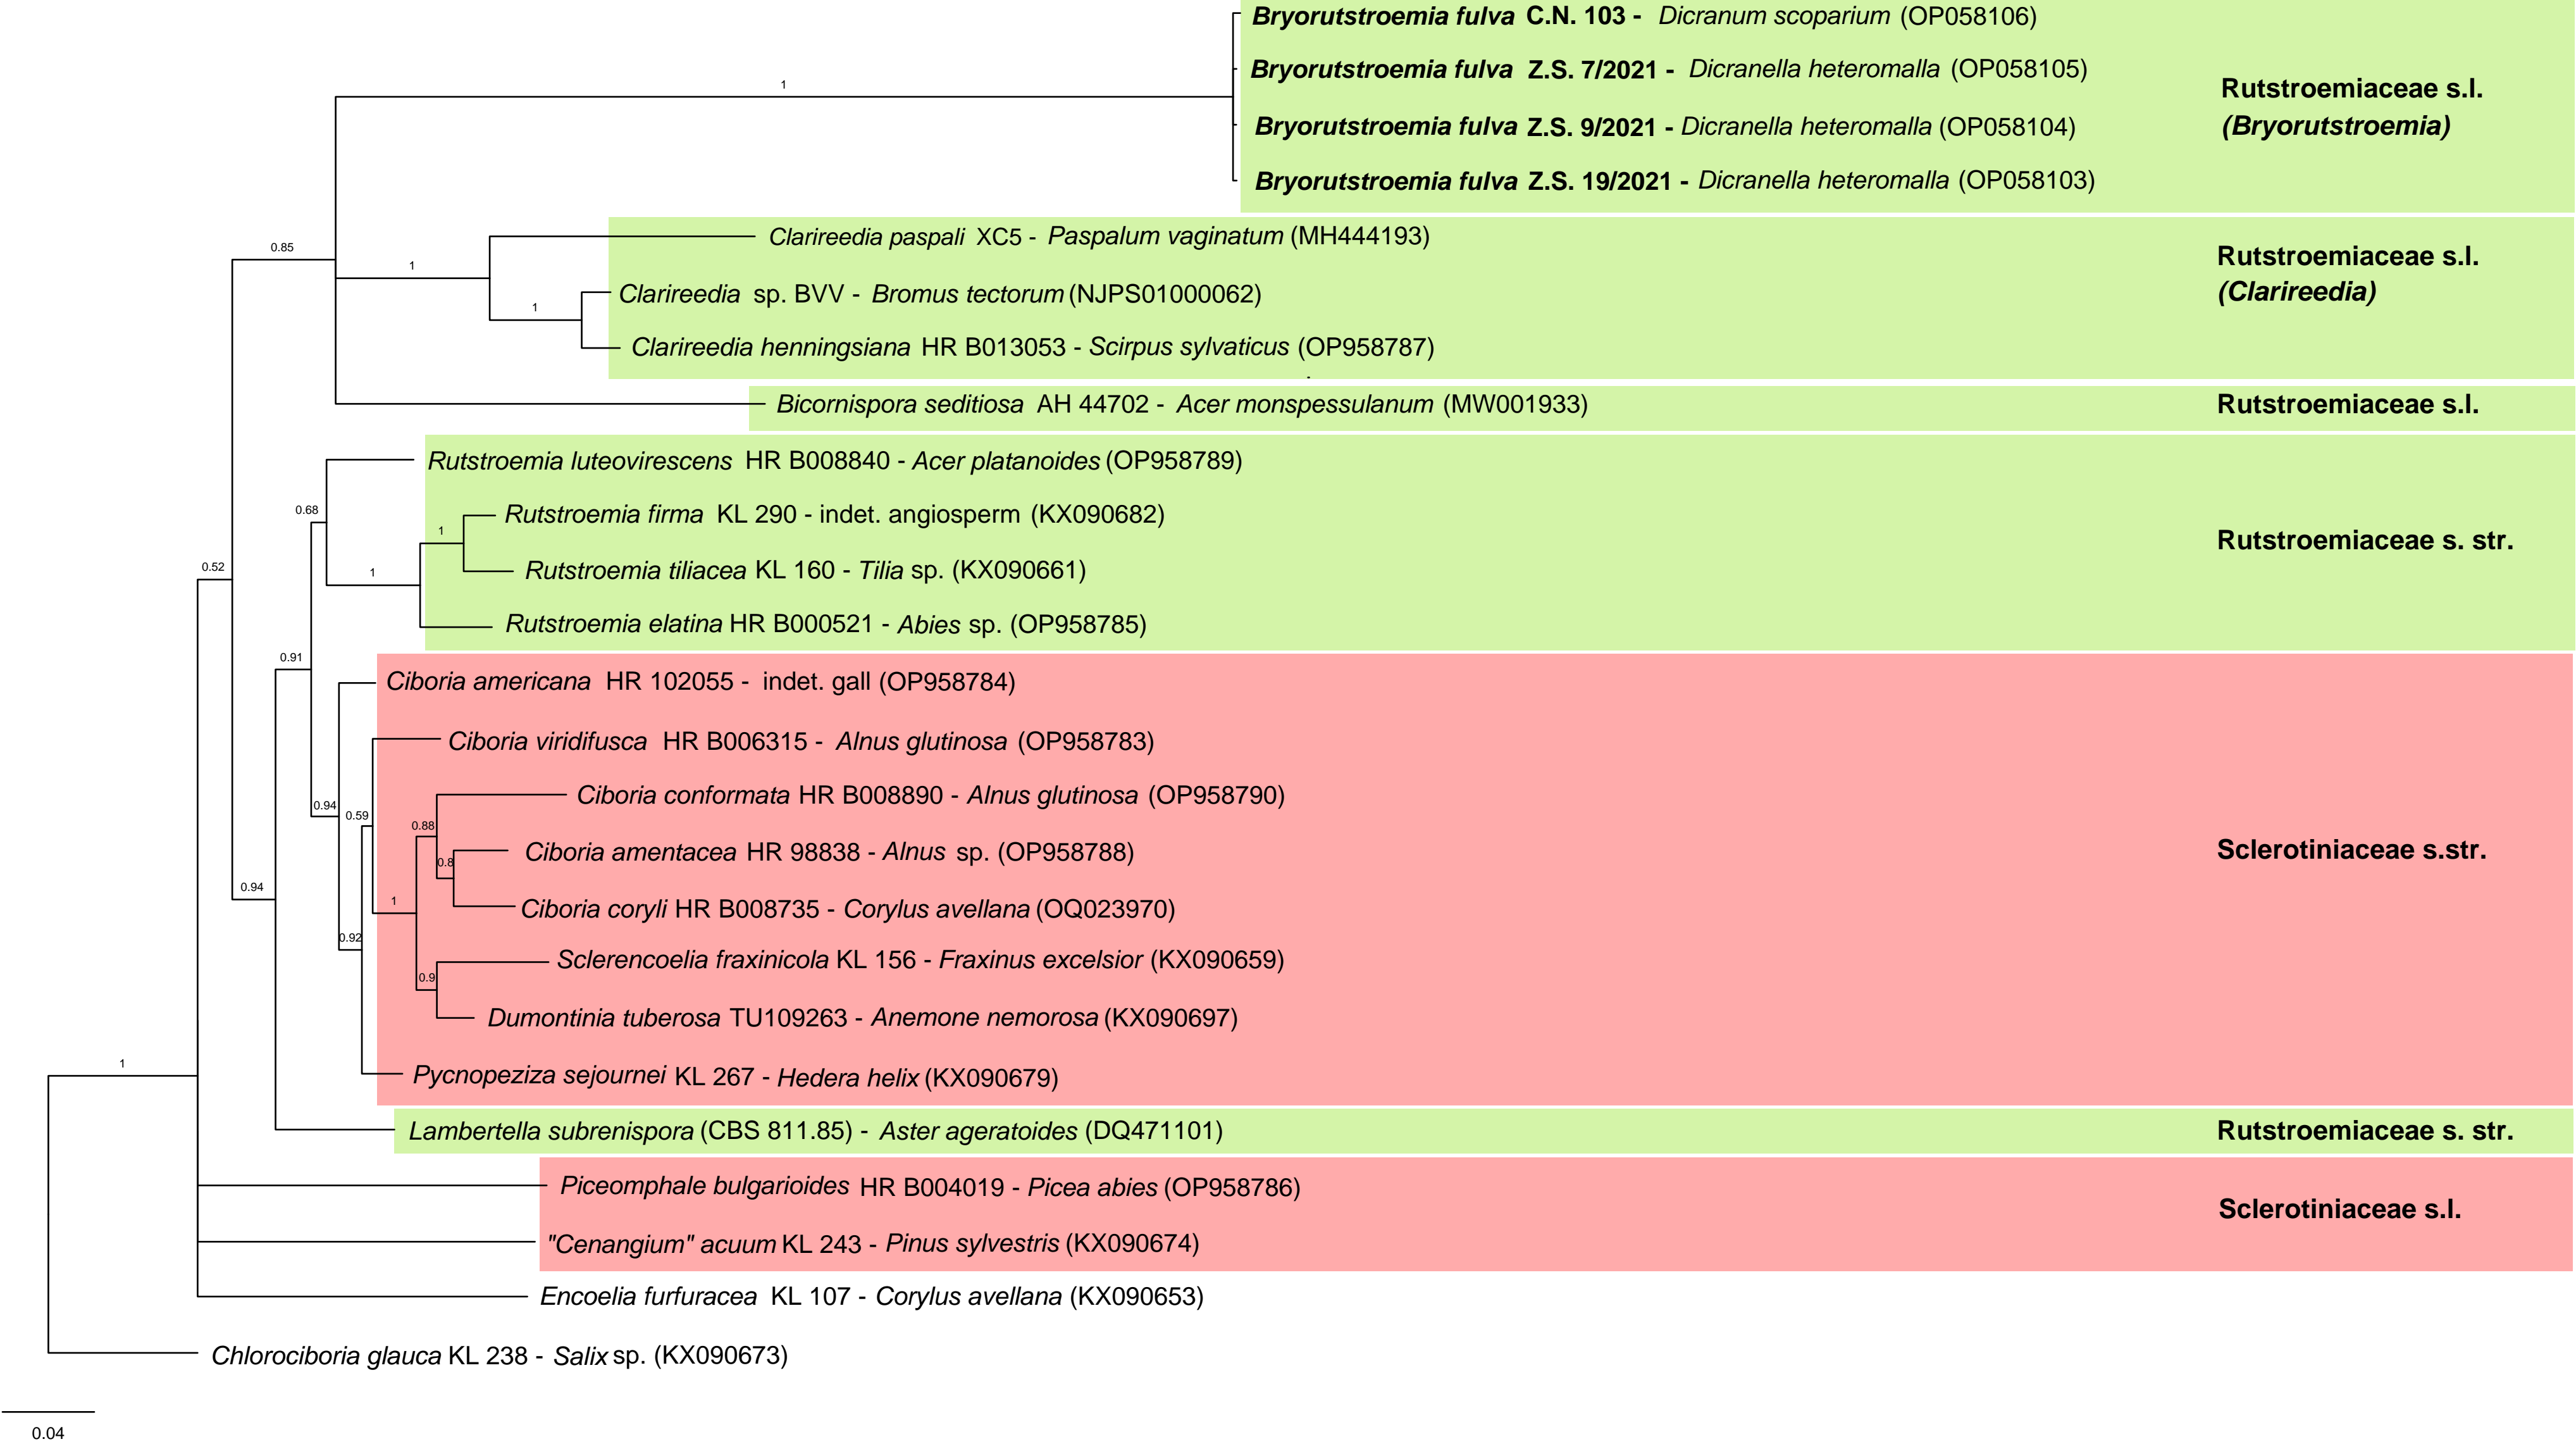

Supplement: s1 [file s1]

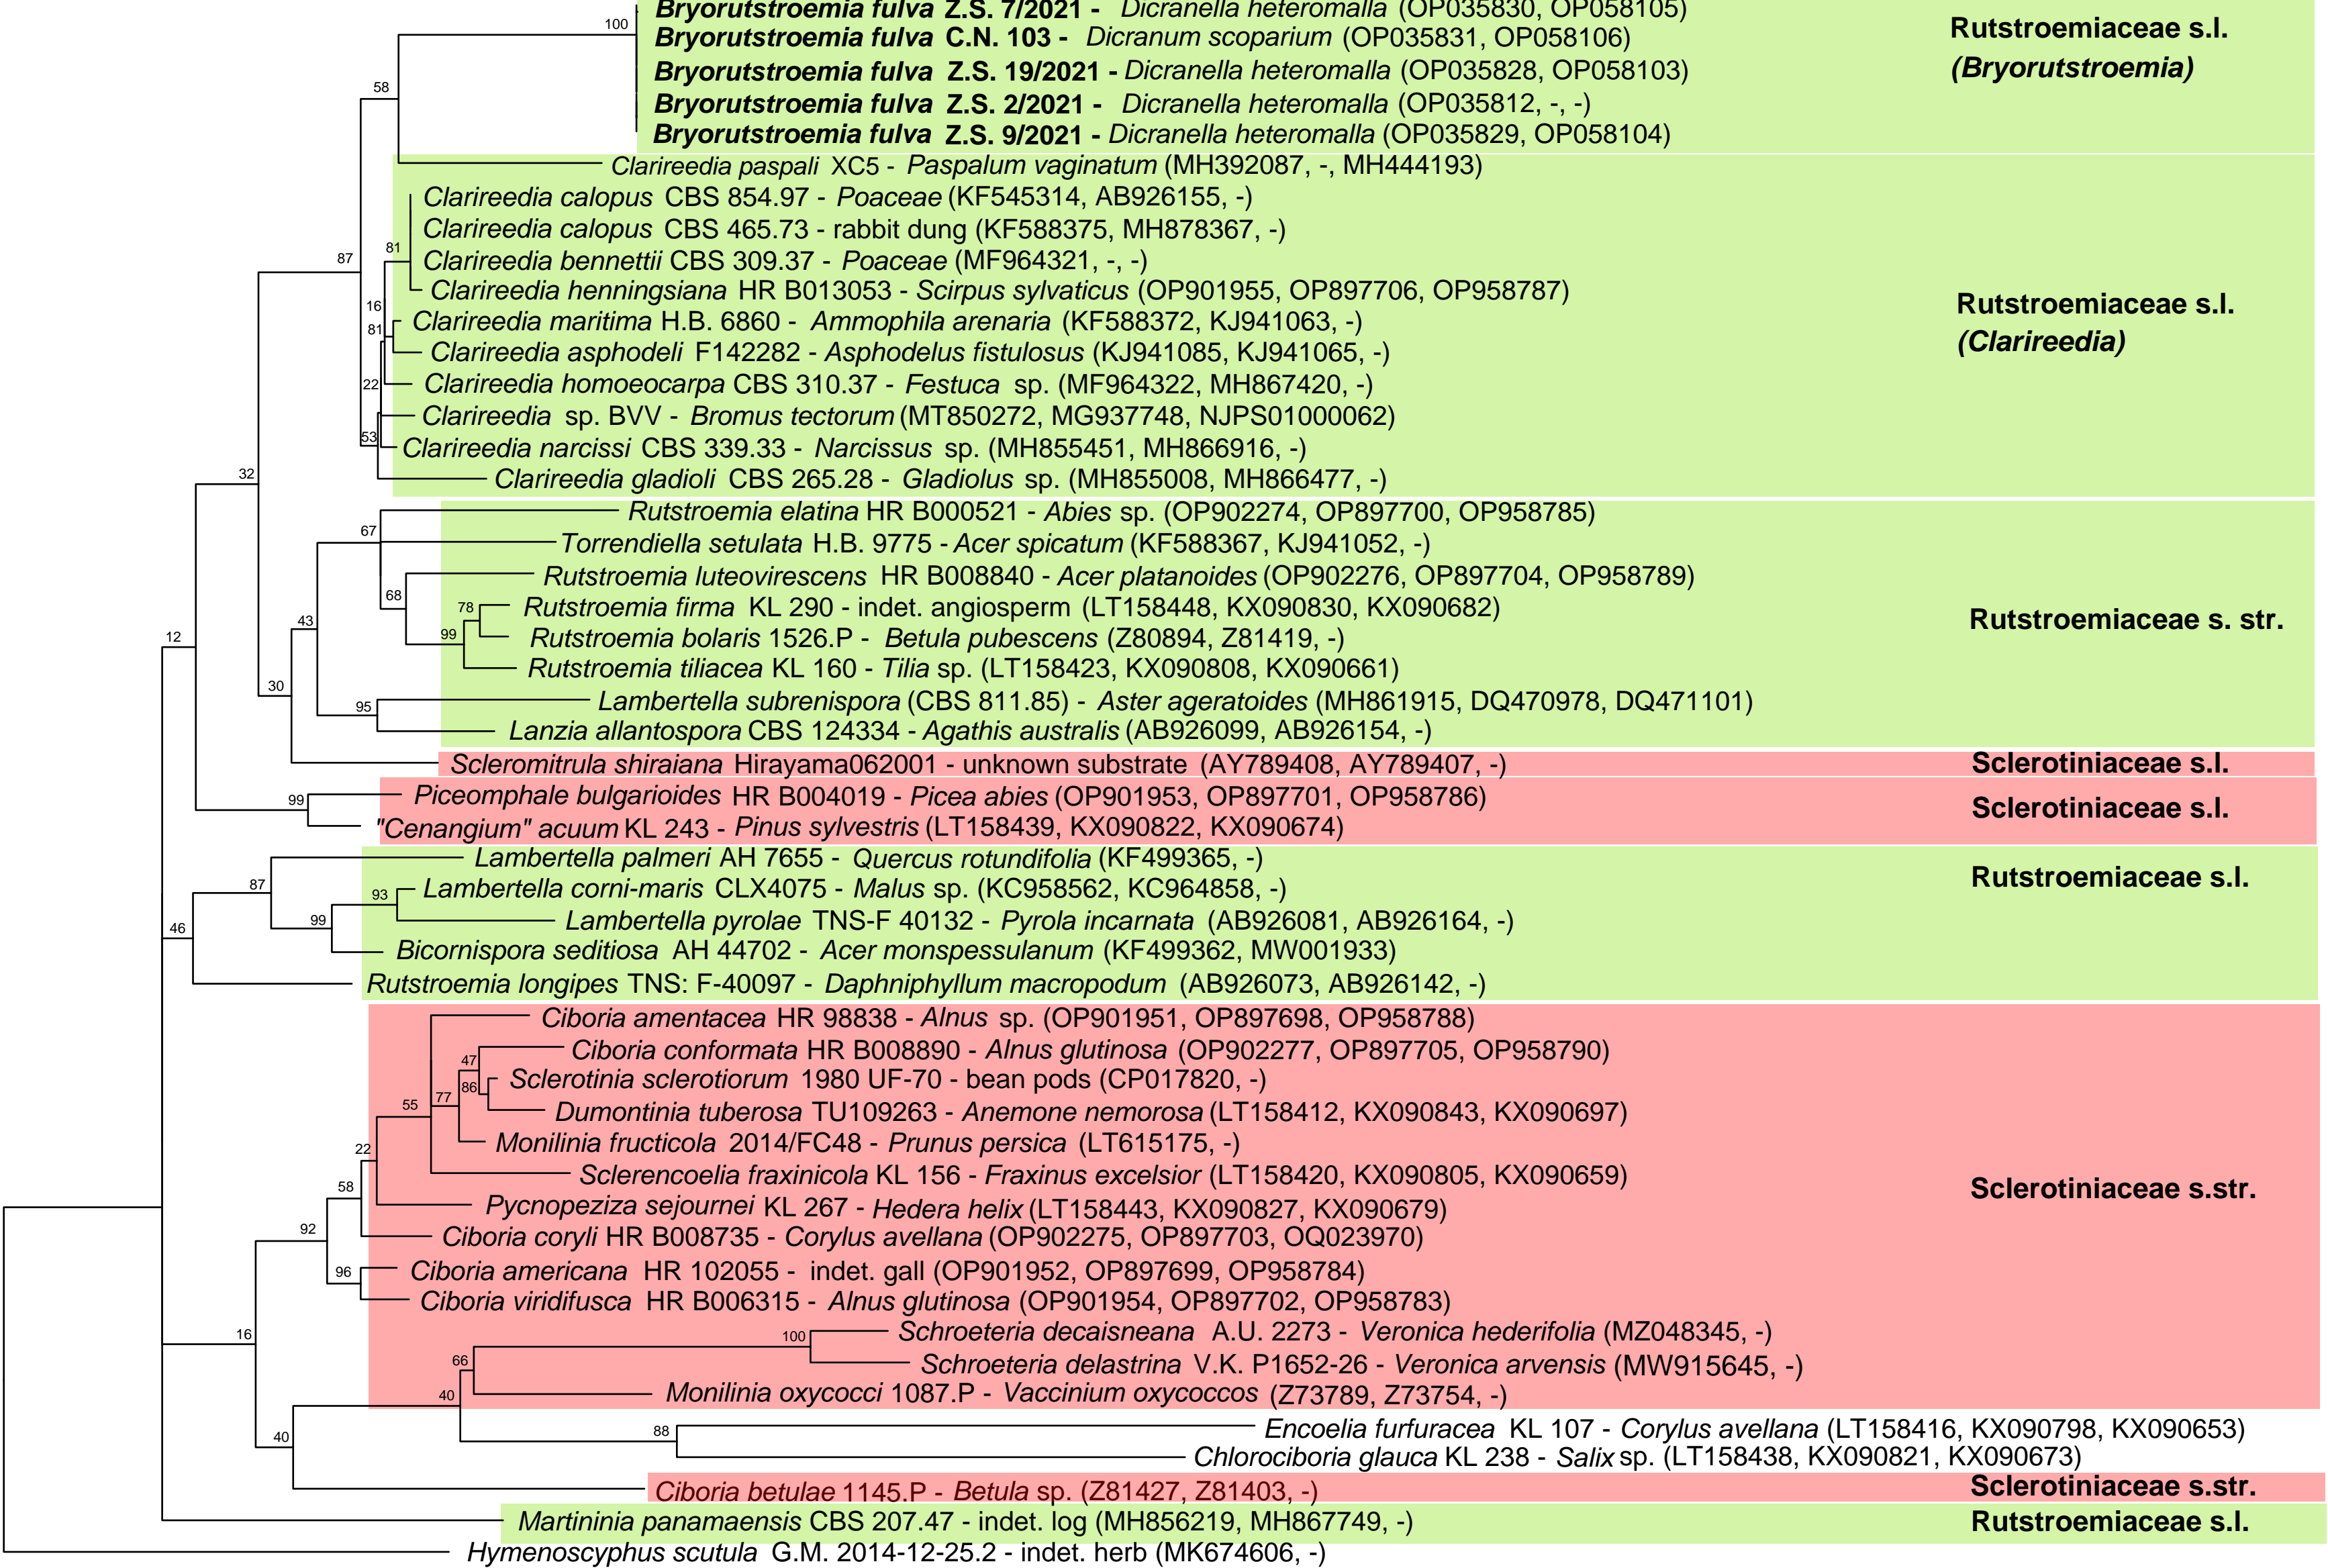

Supplement: s1 [file s1]

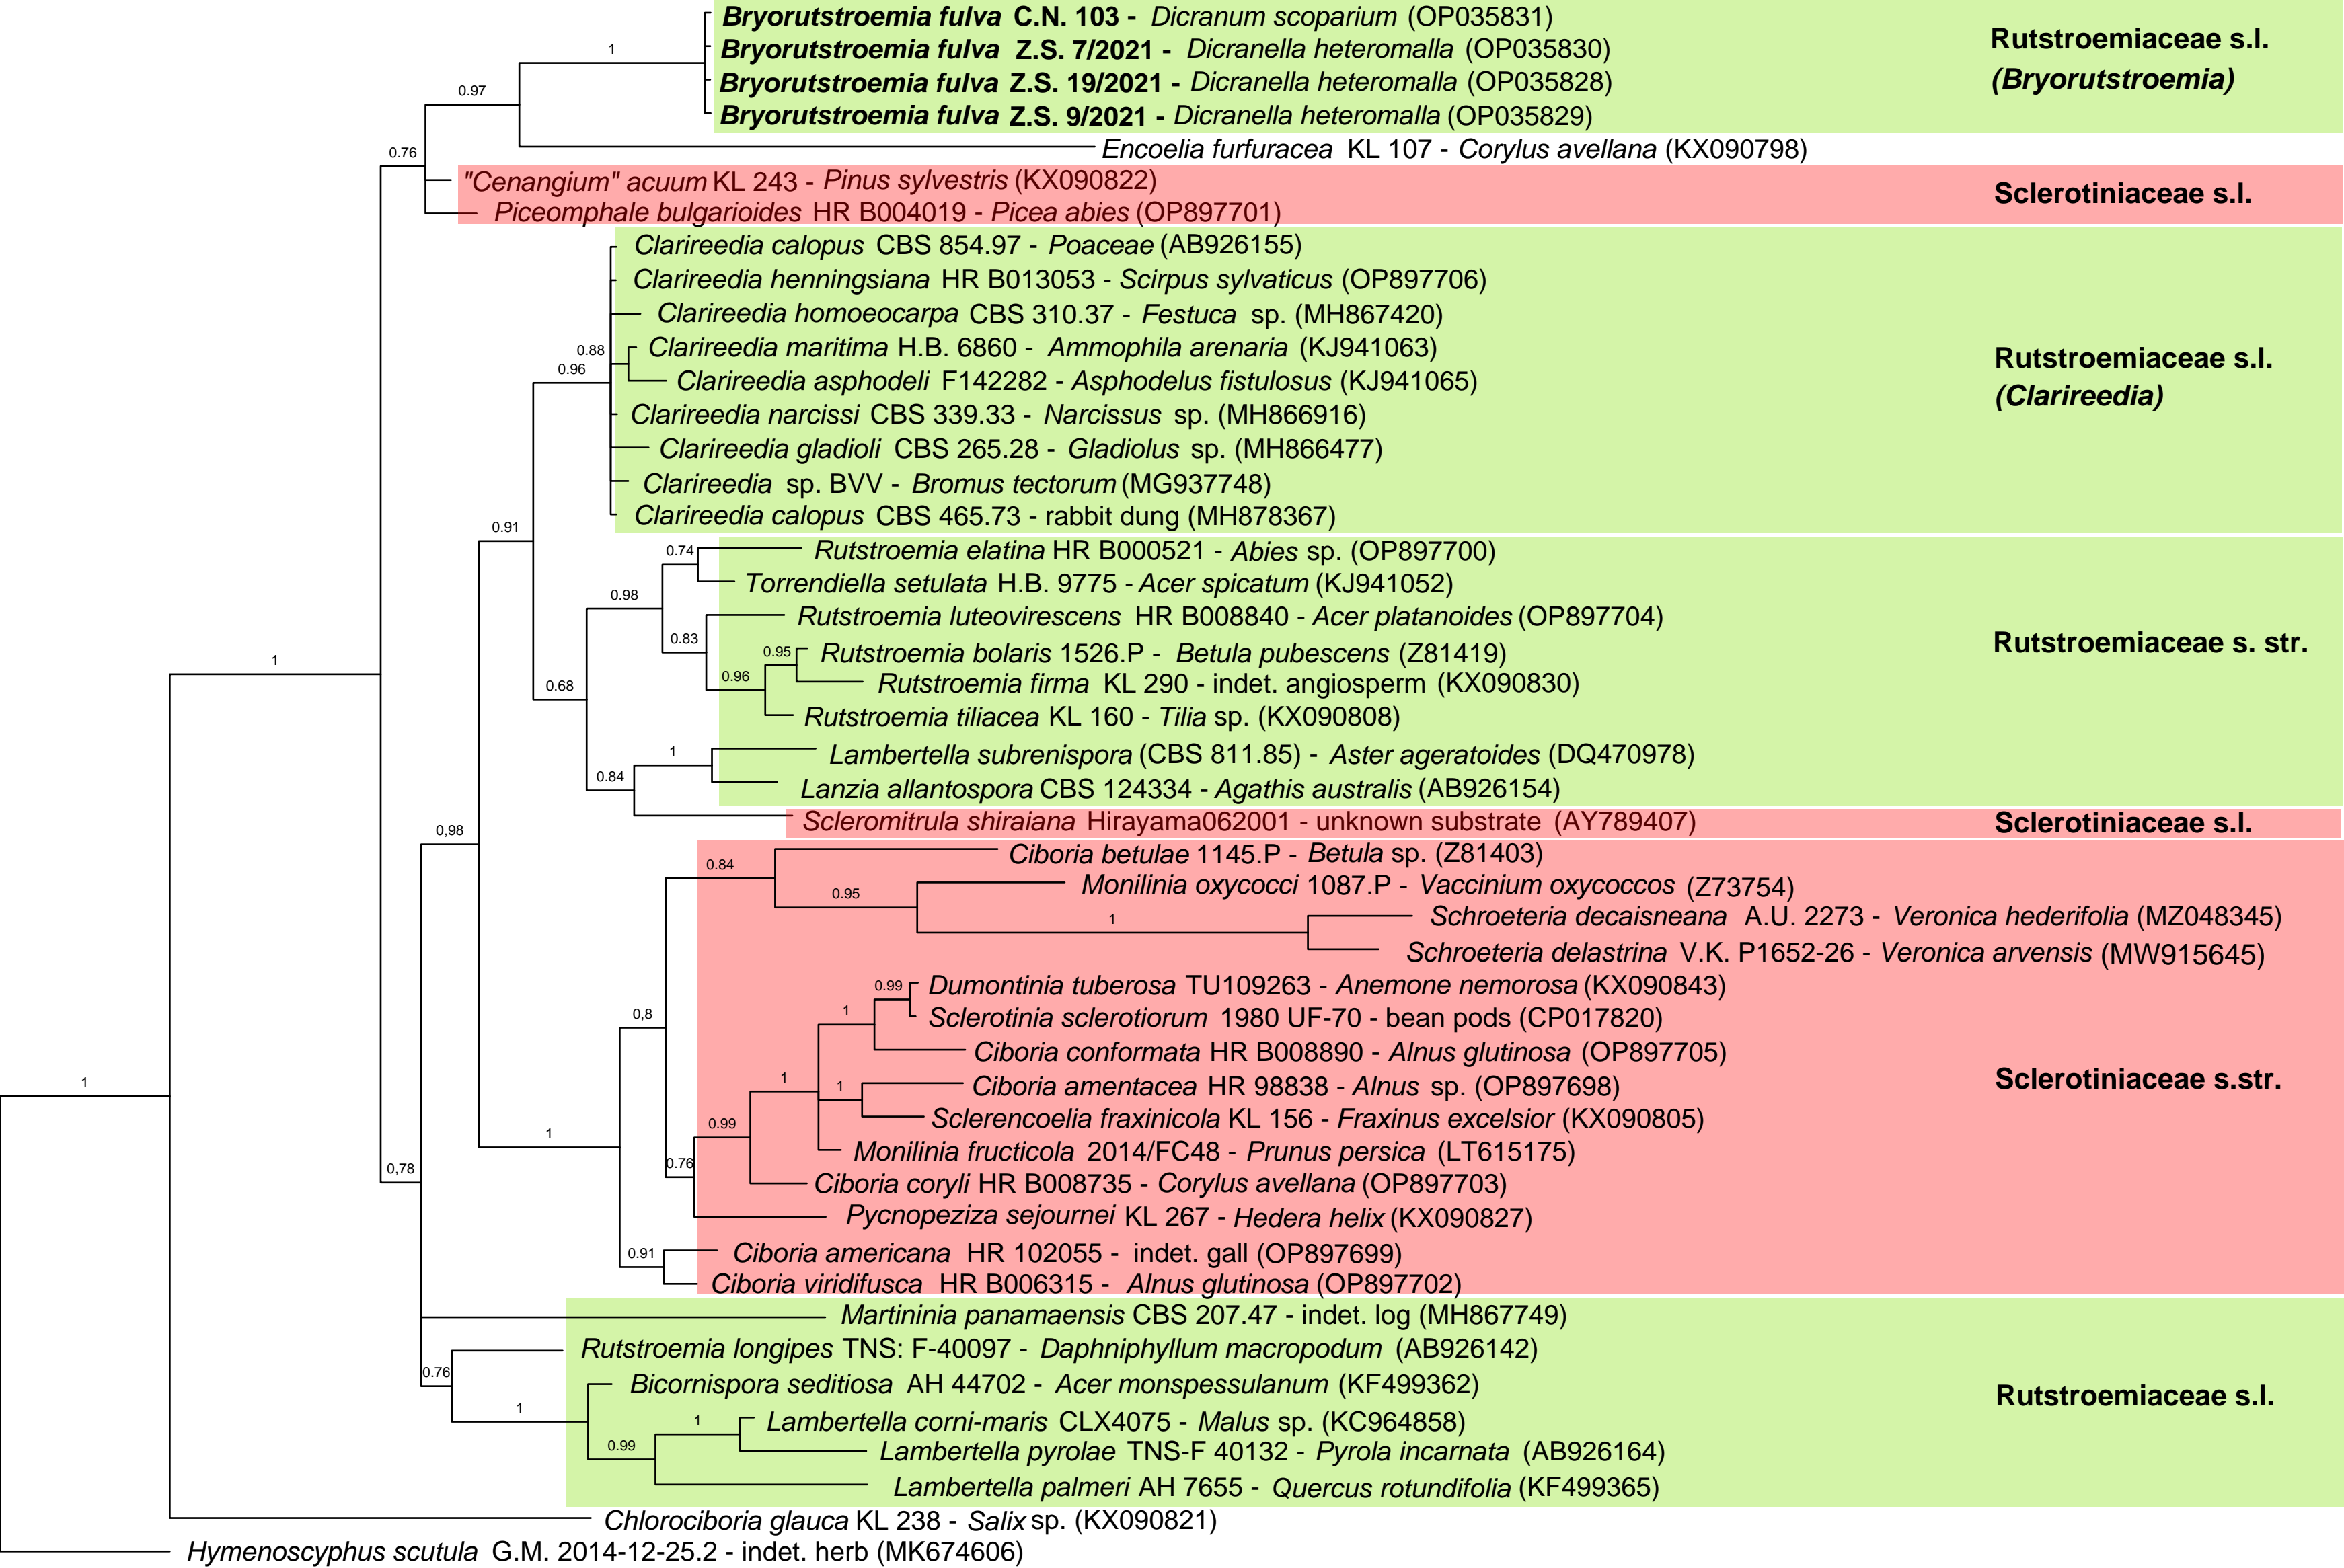

Supplement: s1 [file s1]
